# Supplementary material
Source: HighWire-hosted journal article supplement (https://erj.ersjournals.com/content/51/1/1702053)
Supplement: inline-supplementary-material-1 [file inline-supplementary-material-1.pdf]

## RESPIRE 2 Supplementary material

| Identifier      | Description                                                                    | Page |
|-----------------|--------------------------------------------------------------------------------|------|
| <b>Sections</b> |                                                                                |      |
| Section S1      | Pre-defined subgroups for efficacy analyses                                    | 2    |
| Section S2      | Safety end-points                                                              | 2    |
| Section S3      | Differences in statistical analysis plan for RESPIRE 2 <i>versus</i> RESPIRE 1 | 3    |
| Section S4      | Study investigators who screened at least one subject                          | 4    |
| <b>Tables</b>   |                                                                                |      |
| Table S1        | Randomisation by country                                                       | 9    |
| Table S2        | Pre-specified pathogens isolated at baseline                                   | 10   |
| Table S3        | Concomitant respiratory medications at baseline                                | 11   |
| Table S4        | Serious treatment-emergent adverse events and deaths                           | 12   |
| <b>Figures</b>  |                                                                                |      |
| Figure S1       | Efficacy of Ciprofloxacin DPI in pre-specified subgroups                       | 14   |

## Section S1 Pre-defined subgroups for efficacy analyses

- The following subgroups were pre-defined for analysis:
  - Patients with and those without positive baseline culture of *Pseudomonas aeruginosa*
  - Patients with an FEV1 <50% and those with an FEV1 ≥50% of predicted at baseline
  - Patients with and those without a hospitalisation due to reported exacerbation in the previous year or more than two reported exacerbations requiring systemic antibiotic treatment in the previous year
  - Patients with and those without positive repeat culture (at least one organism in common) before start of study treatment (i.e. based on the central lab result at screening and randomisation visit)
  - Patients with and those without chronic macrolide use
  - Patients with and those without a ciprofloxacin-resistant pathogen based on systemic breakpoints at baseline (see online supplementary section S2).

## Section S2 Safety end-points

- All adverse events were classified using Medical Dictionary for Regulatory Activities (MedDRA Version 19.0). The results were summarised as a minimum based on system organ class and preferred term. Data were also summarised by intensity and causality according to the investigator's assessment.
- Minimal inhibitory concentrations (MICs) of sputum isolates tested against ciprofloxacin. Elevated (resistant) MICs were classified based on Clinical and Laboratory Standards Institute breakpoints as follows:<sup>1</sup>
  - *Haemophilus influenzae*: ≥2 µg/mL
  - *Moraxella catarrhalis*: ≥2 µg/mL
  - *Pseudomonas aeruginosa*: ≥4 µg/mL
  - *Staphylococcus aureus*: ≥4 µg/mL
  - *Streptococcus pneumoniae*: ≥4 µg/mL
  - *Burkholderia cepacia*: ≥4 µg/mL
  - *Stenotrophomonas maltophilia*: ≥4 µg/mL

---

<sup>1</sup>Clinical and Laboratory Standards Institute (CLSI). Performance Standards for Antimicrobial Susceptibility Testing. 2016

### **Section S3** Differences in statistical analysis plan for RESPIRE 2 *versus* RESPIRE 1

The analysis of the first secondary efficacy end-point according to the Food and Drug Administration (FDA) analysis plan “frequency of exacerbation events (stringent definition)” was changed so that no explicit extrapolations were performed for patients not completing the 48-week period. Instead, the same model as for the primary efficacy end-point according to the EMA/other analysis plan was used (i.e. patients’ time in study as an offset variable).

A weighted Bonferroni adjustment using  $\alpha=0.049$  for the 14 days on/off regimen and  $\alpha=0.001$  for the 28 days on/off regimen was applied. By prospectively adjusting the alpha level (an amendment to the statistical analysis plan approved by regulatory bodies), the power to detect a statistically significant difference in the 14-days arm was increased. Concurrently, the power in the 28-day arm was decreased.

## Section S4 Study investigators who screened at least one subject

- Argentina: Monica Grilli, Hospital Español de Mendoza, Godoy Cruz; Luis Otero Vidal, Hosp Zonal Espec en Agudos y Cronicos 'Dr. A. A. Cetrangolo', Buenos Aires; Marcos Langer, Centro Dr. Lazaro Langer DAMIC, Córdoba.
- Australia: Martin Phillips, Institute for Respiratory Health, Perth; Peter Wark, John Hunter Hospital, New Lambton; Dimitar Sajkov, Flinders Medical Centre, Bedford Park; Huw Davies, Repatriation General Hospital, Daws Park; Gary Hammerschlag, Royal Melbourne Hospital, Parkville; Steven Lindstrom, St George Hospital, Kogarah; Peter Bremner, Western Respiratory Trial Specialists, Murdoch.
- Austria: Holger Flick, LKH-Univ. Klinikum Graz, Graz.
- Brazil: Adalberto Sperb Rubin, Santa Casa De Porto Alegre, Porto Alegre; Luiz Octavio Freire, Hospital Mãe de Deus, Porto Alegre.
- Bulgaria: Dimitar Getov, Regional Hospital Of Pulmonary Disease Rousse 1, Ruse; Stoyan Madzharov, 4th MHAT Sofia, Sofia; Mihail Kirov, Multi-profile Hospital for Active Treatment – Prof. Dr. Para, Lovech; Ivan Kiselov, MHAT 'Sveti Ivan Rilski', Razgrad; Hristo Metev, Specialized Hospital for Active Treatment of Pneumo-phtisiat, Ruse; Rumen Tiholov, MHAT 'Sveti Ivan Rilski', Kozlodui; Ivo Stanchev, DCC 'Akta Medika', Sevlievo; Christo Terziev, MHAT 'Dr. Ivan Seliminski', Sliven; Bistra Stefanova, UMHAT 'Prof. Kirkovich', Stara Zagora; Krasimir Donchev, MHAT 'Dr.Tota Venkova' AD-Gabrovo, Gabrovo.
- China: Jian an Huang, The First Affiliated Hospital of Soochow University, Suzhou; Li Zhao, Shengjing Hospital of China Medical University, Shenyang; Fuxin Hui, Wuxi People's Hospital, Wuxi; Yong He, The Third Affiliated Hospital of the Third Military Medical, Chongqing; Fuqiang We, West China Hospital, Sichuan University, Chengdu; Jiulong Kuang, The Second Affiliated Hospital of Nanchang University, Nanchang; Xiwei Zheng, General Hospital of Ningxia Medical University, YinChuan; Xiuhu Fu, Affiliated Hospital of Inner Mongolia Medical College, Hohhot; Huiping Li, Shanghai Pulmonary Hospital, Shanghai; Jinghua Yang, Beijing Anzhen Hospital, Beijing; PingChao Xiang, Peking University Shougang Hospital, Beijing; Rongchang Chen, The First Affiliated Hospital Of Guangzhou Medical University, Guang Zhou.
- Czech Republic: Jiri Votruba, Vseobecna fakultni nemocnice v Praze, Praha 5; Vaclava Bartu, Medicon, a.s., Praha 4; Norbert Pauk, Nemocnice Na Bulovce, Praha 8.
- Germany: Martin Hoffmann, Pneumologikum im Südstadtforum, Hannover; Anneliese Linnhoff, Research Centre for Medical Studies (RCMS), Berlin; Andrés de Roux,

- Studienpraxis Dr. de Roux, Berlin; Ludger Lindemann, Gemein.-Praxis Lindemann/Ern, Gelsenkirchen; Christian Geßner, POIS Leipzig GbR, Leipzig; Reiner Bonnet, Zentralklinik Bad Berka GmbH, Bad Berka; Claus Kroegel, Universitätsklinikum Jena, Jena; Sabine Ballenberger, Ballenberger, Freytag, Wenisch – Institu f. klin. Forschung, Neu-Isenburg; Claus Keller, Studienzentrum Dr. Keller, Frankfurt/Main; Tobias Welte, Medizinische Hochschule Hannover, Hannover.
- Hong Kong: David Chi-Leung Lam, Queen Mary Hospital, Hong Kong; Kwok Chu KWONG, Princess Margaret Hospital, Hong Kong; Kit Man Sin, Tuen Mun Hospital, Hong Kong; David Hui, The Chinese University of Hong Kong (CUHK) – Faculty of Medi, Hong Kong.
  - Republic of Korea: Min Kwang Byun, Gangnam Severance Hospital, Gangnam-gu, Seoul; Sang Yeub Lee, Korea University Anam Hospital, Seoul; Ji Ye Jung, Severance Hospital – Yonsei University Health System, Seoul; Soon Seog Kwon, The Catholic University of Korea Bucheon St. Mary's Hospital, Bucheon; Myung Sook Kim, The Catholic University of Korea Daejeon St. Mary's Hospital, Jung-gu, Daejeon; Ju Sang Kim, The Catholic University of Korea, Incheon St. Mary's Hospital, Incheon; Ah Young Shin, The Catholic University of Korea, Incheon St. Mary's Hospital, Incheon; Hokee Yum, Inje University Seoul Paik Hospital, Seoul; Myung Jae Park, Kyung Hee University Hospital, Seoul; Chul-Gyu Yoo, Seoul National University Hospital, Seoul; Kwan-Ho Lee, Yeungnam University Medical Center, Nam-gu; Sung Hwan Jeong, Gachon University Gil Medical Center, Incheon.
  - Latvia: Ilze Reinholde, Rīgas pilsētas 1. Klīniskā slimnīca, Riga; Aurika Babjoniseva, Pauls Stradins Clinical University Hospital, Riga; Lilita Mitrofanova, Health Medical Center, Daugavpils; Zinaida Lapkovska, Kraslava Hospital, Kraslava; Natalija Visocka, Dubultu poliklinika, Jurmala; Iveta Kroica, Latvian University Medical Postgraduate Institute, Riga; Inga Vikmane, Riga East Clinical University Hospital clinic 'Gailezers', Riga; Nadezda Kolosa, Daugavpils Regional Hospital, Daugavpils.
  - Lithuania: Dalius Vaicius, Vilnius University Hospital Santariskiu Klinikos, Vilnius; Arvydas Valavicius, Klaipeda University Hospital, Klaipeda.
  - The Netherlands: D.R.A.J. de Munck, Maxima medisch centrum, locatie Veldhoven, Veldhoven; Willem Boersma, Noordwest Ziekenhuisgroep, Alkmaar; Sander De Hosson, Ziekenhuis Assen, Assen; Willem Pieters, Elkerliek Hospital, Helmond; G.J. De Vries, Orbis Medisch Centrum, Sittard.
  - The Philippines: Camilo Roa, Philippine General Hospital, Pasay; Teresita de Guia, Philippine Heart Center [Pulmonary Laboratory], Quezon; Ronaldo Panganiban Jr., Mother Teresa Of Calcutta Medical Center, San Fernando; Joven Roque Gonong,

Lung Center Of The Philippines, Quezon City; Ronald Allan Payumo, Mary Johnston Hospital, Manila.

- Poland: Elzbieta Hajol, Nzoz Krak-Medyk Sp. z o.o., Krakow; Tomasz Kachel, Specjalistyczny Gabinet Lekarski Tomasz Kachel, Bystra; Krystyna Folcik, Samodzielny Specjalistyczny ZZOZ im. Dr T. Dunina, Rudka, gm. Mrozy; Anna Olech-Cudzik, Ostrowieckie Centrum Medyczne S.C., Ostrowiec Swietokrzyski; Adam Nowinski, Medica Pro Familia S.A., Warszawa; Krzysztof Lis, NZOZ Promed Przychodnia PODKARCZOWKA, Kielce; Anna Janowicz, Przychodnia Lekarska 'Poludnie', Czestochowa; Krzysztof Filipek, Medica Pro Familia S.A., Katowice; Adam Smialowski, Prywatna Praktyka Lekarska lek. med. A. Smialowski, Pabianice.
- Portugal: António Carvalheira Santos, H. Pulido Valente. Centro Hospitalar Lisboa Norte, Lisboa; Pilar Azevedo, H. Santa Maria. Centro Hospitalar de Lisboa Norte, Lisboa; Regina Monteiro, C.H. de Vila Nova Gaia/Espinho, Vila Nova de Gaia.
- Romania: Dragos BUMBACEA, Spitalul Universitar de Urgenta Elias, Bucharest; Cristian Cojocar, Netconsult, Iasi; Alexandru Stanciu, Spitalul Judetean de Urgenta Ploiesti, Ploiesti; Ana-Maria Trailescu, Sp. Cl. de Boli Infectioase si Tropicale 'Dr. Victor Babes', Bucharest; Ruxandra Ulmeanu, Institutul de Pneumoftiziologie 'Marius Nasta', Bucharest; Dana Alexandrescu, Clinica Pneumomedica, Brasov; Mihaela MALIS, Impatiens, Codlea; Oana Cristina Arghir, Spitalul Clinic de Pneumoftiziologie Constanta, Constanta; Stefan Mihaicuta, Sp. Clinic Boli Infectioase si Pneumoftiziologie Dr. V Babes, Timisoara; Angelica SAVU, Angisan Grup, Bucharest; Miron Bogdan, Institutul de Pneumoftiziologie 'Marius Nasta', Bucharest.
- Russian Federation: Alexander Bezlepko, Main Military Clinical Hospital n.a. N.N. Burdenko, Moscow; Vladimir Yakusevich, State Clinical Hospital for Emergency Medical Care n.a.N.V., Yaroslavl; Alexey Chermensky, LLC Institute of Medical Trials, St Petersburg; Evgeny Shmelev, City Clinical Hospital # 24, Moscow; Alexander Averyanov, FMBA Federal Research Clinical Centre, Moscow; Dmitry Tikhanov, LLC Alliance Biomedical, Saint Petersburg; Ekaterina Oleynichenko, FGBU Polyclinic #3 RF President Administrative Department, Moscow; Shamil Zagidullin, City Clinical Hospital # 21, Ufa; Natalia Kostina, Regional Clinical Hospital #1, Voronezh; Veronika Popova, Limited Company Reavita, St Petersburg; Alexander Krivosheev, MBUZ City Clinical Hospital #1, Novosibirsk; Lyubov Kudelya, State Novosibirsk Regional Clinical Hospital, Novosibirsk; Anton Edin, LLC Alliance Biomedical – Russian Group, Saint Petersburg; Olga Nesmeyanova, GBUZ 'Chelyabinsk Regional Clinical Hospital', Chelyabinsk; Irina Semenova, First City Clinical Hospital n.a. E.E.Volosevich, Arkhangelsk; Nadezhda Logvinenko,

Emergency city Hospital №25 , Novosibirsk; Liudmila Lenskaya, Tomsk Regional Clinical Hospital, Tomsk.

- Serbia: Nada Lazovic, General Hospital Cacak, Cacak; Slavica Rakovic, General Hospital Valjevo, Valjevo; Zorica Lazic, Clinical Center Kragujevac, Clinic for Pulmology, Kragujevac; Tatjana Pejic, Clinical Center Nis, Clinic for Pulmonary Diseases, Nis; Vesna Skodric Trifunovic, Clinical Center of Serbia, Clinic for Pulmology, Belgrade; Vesna Dopudja Pantic, Zvezdara University Medical Center, Internal Clinic, Belgrade; Gorana Sovljanski, Municipal Institute for Lung diseases and tuberculosis, Belgrade; Aleksandra Ogrizovic Ponjevic, General Hospital Dr. Radivoj Simonovic, Sombor; Mirna Djuric, The Institute for Pulmonary Disease of Vojvodina, Sremska Kamenica; Maria Drugdova, Pneumo-Allergy centrum s.r.o., Bratislava.
- South Africa: Axel Bruning, Practise Dr. Bruning, Gatesville; Mohamed S Abdool-Gaffar, Kingsway Medical Centre, Durban.
- Taiwan: Ping-Hung Kuo, National Taiwan University Hospital, Taipei; Kang-Yun Lee, Taipei Medical University (TMU) – Shuang Ho Hospital (SHH), New Taipei; Ming-Shyan Huang, Kaohsiung Medical University Chung-Ho Memorial Hospital, Kaohsiung; Wu-Huei Hsu, China Medical University Hospital, Taichung.
- Thailand: Anuchit Niyompattama, Maharat Nakhonratchasima Hospital, Muang; Watchara Boonsawat, Khon Kaen University, Srinagarind Hospital, Muang; Anan Wattanatham, Phramongkutklao Hospital, Bangkok; Kajorn Suntrapiwat, Buddhachinaraj Hospital, Muang.
- Turkey: Hakan Gunen, Sureyyapasa Center for Chest Diseases, İstanbul; Aykut ÇİLLİ, Akdeniz Universitesi Hastanesi, Antalya; Sevgi Saryal, Ankara University Medical Faculty, Ankara; Öner DİKENSOY, Gaziantep Universitesi, Gaziantep; Meral Uyar, Gaziantep Universitesi, Gaziantep; Ali Kocabas, Cukurova University Medical Faculty, Adana; Nurhan Koksall, Ondokuz Mayıs University Medical Faculty, Samsun; Bahar Kurt, Ankara Diskapi Yildirim Beyazit Training and Research Hospital, Ankara; Kursat Uzun, Necmettin Erbakan University Meram Medical Faculty, Konya; Sibel Atis Nayci, Mersin Universtiy Medical Faculty, Mersin; Abdullah Sayiner, Ege University Medical Faculty, Izmir.
- United States of America: Krishna Pudi, Upstate Pharmaceutical Research, Greenville; Shari Brazinsky, Institute of Healthcare Assessment, Inc., San Diego; Jyoti Datta, Apostle Clinical Trials, Long Beach; Timothy Aksamit, Mayo Clinic, Rochester; Rabih Loutfi, Sarasota Memorial Hospital, Sarasota; Vadim Leyenson, Chest Medicine Clinical Services, Skokie; Boris Sagalovich, Comprehensive Clinical

Research Center of New York, Brooklyn; Pinak Acharya, Doylestown Hospital  
Medical Research Department, Doylestown; Dennis Lawlor, Consultants in  
Pulmonary Medicine, Olathe; Ryan Klein, NewportNativeMD, Inc., Newport Beach;  
Yamirka Duardo Guerra, LCC Medical Research Institute, LLC, Miami.



**TABLE S1** Randomisation by country

| <b>Country</b>         | <b>Patients</b> |
|------------------------|-----------------|
|                        | <b>N=521</b>    |
| <b>Russia</b>          | 60 (11.5)       |
| <b>Bulgaria</b>        | 54 (10.4)       |
| <b>Latvia</b>          | 45 (8.6)        |
| <b>Poland</b>          | 39 (7.5)        |
| <b>South Korea</b>     | 34 (6.5)        |
| <b>China</b>           | 33 (6.3)        |
| <b>Serbia</b>          | 33 (6.3)        |
| <b>Romania</b>         | 32 (6.1)        |
| <b>Turkey</b>          | 30 (5.8)        |
| <b>Australia</b>       | 21 (4.0)        |
| <b>Germany</b>         | 19 (3.6)        |
| <b>The Netherlands</b> | 19 (3.6)        |
| <b>United States</b>   | 16 (3.1)        |
| <b>Portugal</b>        | 14 (2.7)        |
| <b>Argentina</b>       | 13 (2.5)        |
| <b>Thailand</b>        | 13 (2.5)        |
| <b>Philippines</b>     | 10 (1.9)        |
| <b>Hong Kong</b>       | 9 (1.7)         |
| <b>Taiwan</b>          | 9 (1.7)         |
| <b>Lithuania</b>       | 6 (1.2)         |
| <b>Brazil</b>          | 5 (1.0)         |
| <b>Czech Republic</b>  | 4 (0.8)         |
| <b>South Africa</b>    | 2 (0.4)         |
| <b>Austria</b>         | 1 (0.2)         |

Data are presented as n (%).

**TABLE S2** Pre-specified pathogens isolated at baseline

| <b>Species</b>               | <b>Ciprofloxacin<br/>DPI 14-days<br/>on/off<br/>n=176</b> | <b>Placebo<br/>14-days<br/>on/off<br/>n=88</b> | <b>Ciprofloxacin<br/>DPI 28-days<br/>on/off<br/>n=171</b> | <b>Placebo<br/>28-days<br/>on/off<br/>n=86</b> | <b>Pooled<br/>placebo<br/>n=174</b> | <b>Total<br/>N=521</b> |
|------------------------------|-----------------------------------------------------------|------------------------------------------------|-----------------------------------------------------------|------------------------------------------------|-------------------------------------|------------------------|
| <b><i>P. aeruginosa</i></b>  | 107 (60.8)                                                | 55 (62.5)                                      | 99 (58.2)                                                 | 54 (63.5)                                      | 109<br>(63.0)                       | 315 (60.7)             |
| <b><i>S. aureus</i></b>      | 43 (24.4)                                                 | 26 (29.5)                                      | 42 (24.7)                                                 | 21 (24.7)                                      | 47 (27.2)                           | 132 (25.4)             |
| <b><i>H. influenzae</i></b>  | 25 (14.2)                                                 | 12 (13.6)                                      | 38 (22.4)                                                 | 15 (17.6)                                      | 27 (15.6)                           | 90 (17.3)              |
| <b><i>S. pneumoniae</i></b>  | 11 (6.3)                                                  | 3 (3.4)                                        | 14 (8.2)                                                  | 7 (8.2)                                        | 10 (5.8)                            | 35 (6.7)               |
| <b><i>M. catarrhalis</i></b> | 11 (6.3)                                                  | 6 (6.8)                                        | 8 (4.7)                                                   | 5 (5.9)                                        | 11 (6.4)                            | 30 (5.8)               |
| <b><i>S. maltophilia</i></b> | 8 (4.5)                                                   | 1 (1.1)                                        | 7 (4.1)                                                   | 4 (4.7)                                        | 5 (2.9)                             | 20 (3.9)               |
| <b><i>B. cepacia</i></b>     | 0                                                         | 2 (2.3)                                        | 1 (0.6)                                                   | 1 (1.2)                                        | 3 (1.7)                             | 4 (0.8)                |

Data are presented as n (%). Pathogens were isolated at screening, and/or Day 1. Patients could have more than one pathogen.

**TABLE S3** Concomitant respiratory medications at baseline

|                                            | <b>Ciprofloxacin<br/>DPI<br/>14-days on/off<br/>n=176</b> | <b>Placebo<br/>14-days on/off<br/>n=88</b> | <b>Ciprofloxacin<br/>DPI<br/>28-days on/off<br/>n=171</b> | <b>Placebo<br/>28-days on/off<br/>n=86</b> |
|--------------------------------------------|-----------------------------------------------------------|--------------------------------------------|-----------------------------------------------------------|--------------------------------------------|
| <b>Any respiratory medication</b>          | 113 (64.2)                                                | 61 (69.3)                                  | 129 (75.4)                                                | 51 (59.3)                                  |
| <b>Mucolytics</b>                          | 47 (26.7)                                                 | 18 (20.5)                                  | 48 (28.1)                                                 | 20 (23.3)                                  |
| <b>Bronchodilators<sup>#</sup></b>         | 72 (40.9)                                                 | 44 (50.0)                                  | 85 (49.7)                                                 | 33 (38.4)                                  |
| <b>Inhaled corticosteroids<sup>†</sup></b> | 57 (32.4)                                                 | 28 (31.8)                                  | 72 (42.1)                                                 | 25 (29.1)                                  |
| <b>Low-dose systemic corticosteroids</b>   | 0 (0)                                                     | 2 (2.3)                                    | 2 (1.2)                                                   | 1 (1.2)                                    |
| <b>Long-term oral macrolides</b>           | 11 (6.3)                                                  | 7 (8.0)                                    | 14 (8.2)                                                  | 8 (9.3)                                    |
| <b>Theophylline</b>                        | 14 (8.0)                                                  | 6 (6.8)                                    | 17 (9.9)                                                  | 5 (5.8)                                    |
| <b>Other respiratory medications</b>       | 1 (0.6)                                                   | 0                                          | 2 (1.2)                                                   | 1 (1.2)                                    |

Patients could be treated with more than one therapy at baseline. Data are presented as n (%). DPI: dry powder for inhalation; <sup>#</sup>: bronchodilators include: long-acting  $\beta$ -agonists, short-acting  $\beta$ -agonists, combination bronchodilators (long-acting), combination bronchodilators (short-acting), long-acting anticholinergic bronchodilators and short-acting anticholinergic bronchodilators; <sup>†</sup>: inhaled corticosteroids include: inhaled corticosteroids and combined corticosteroids and long-acting  $\beta$ -agonists.

**TABLE S4** Serious treatment-emergent adverse events and deaths

| Preferred term                                                           | Ciprofloxacin DPI                    |                         | Pooled placebo<br>n=174 |
|--------------------------------------------------------------------------|--------------------------------------|-------------------------|-------------------------|
|                                                                          | 14-days on/off<br>n=174 <sup>#</sup> | 28-days on/off<br>n=171 |                         |
| <b>Any serious TE adverse event</b>                                      | 45 (25.9)                            | 28 (16.4)               | 41 (23.6)               |
| Respiratory, thoracic and mediastinal disorders                          | 30 (17.2)                            | 19 (11.1)               | 26 (14.9)               |
| Bronchiectasis exacerbations                                             | 24 (13.8)                            | 17 (9.9)                | 21 (12.1)               |
| Haemoptysis                                                              | 3 (1.7)                              | 2 (1.2)                 | 4 (2.3)                 |
| Chronic obstructive pulmonary disease                                    | 3 (1.7)                              | 0                       | 1 (0.6)                 |
| Infections and infestations                                              | 5 (2.9)                              | 5 (2.9)                 | 9 (5.2)                 |
| Pneumonia                                                                | 2 (1.1)                              | 3 (1.8)                 | 2 (1.1)                 |
| Infective exacerbation of bronchiectasis                                 | 3 (1.7)                              | 0                       | 2 (1.1)                 |
| Gastrointestinal disorders                                               | 3 (1.7)                              | 2 (1.2)                 | 2 (1.1)                 |
| Neoplasms benign, malignant and unspecified (including cysts and polyps) | 2 (1.1)                              | 1 (0.6)                 | 3 (1.7)                 |
| Musculoskeletal and connective tissue disorders                          | 2 (1.1)                              | 0                       | 2 (1.1)                 |
| Nervous system disorders                                                 | 1 (0.6)                              | 2 (1.2)                 | 0                       |
| Cardiac disorders                                                        | 0                                    | 2 (1.2)                 | 0                       |
| Hepatobiliary disorders                                                  | 1 (0.6)                              | 0                       | 1 (0.6)                 |
| Blood and lymphatic system disorders                                     | 0                                    | 0                       | 1 (0.6)                 |
| Ear and labyrinth disorders                                              | 1 (0.6)                              | 0                       | 0                       |
| Eye disorders                                                            | 0                                    | 0                       | 1 (0.6)                 |
| Injury, poisoning and procedural complications                           | 0                                    | 0                       | 1 (0.6)                 |
| Metabolism and nutrition disorders                                       | 0                                    | 0                       | 1 (0.6)                 |
| Pregnancy, puerperium and                                                | 0                                    | 1 (0.6)                 | 0                       |

|                                                |                |                |                |
|------------------------------------------------|----------------|----------------|----------------|
| perinatal disorders                            |                |                |                |
| Psychiatric disorders                          | 1 (0.6)        | 0              | 0              |
| Reproductive system and breast disorders       | 1 (0.6)        | 0              | 0              |
| Vascular disorders                             | 0              | 0              | 1 (0.6)        |
| <b>Any TE adverse event with outcome death</b> | <b>3 (1.7)</b> | <b>4 (2.3)</b> | <b>2 (1.1)</b> |
| Bronchiectasis                                 | 1              | 2              | 2              |
| Congestive cardiomyopathy                      | 0              | 1              | 0              |
| Cor pulmonale                                  | 0              | 1              | 0              |
| Gastrointestinal haemorrhage                   | 1              | 0              | 0              |
| Oesopharyngeal carcinoma                       | 1              | 0              | 0              |

---

#: two randomised subjects did not receive study medication (both in Ciprofloxacin DPI 14-days on/off). Data are presented as n (%). Serious TE adverse events are listed by MedDRA system organ class and by preferred term if more than one subject in any treatment group was affected. Subjects could experience more than one serious TE. DPI: dry powder for inhalation; MedDRA: Medical Dictionary for Regulatory Activities. TE: treatment emergent.

**FIGURE S1** Efficacy of Ciprofloxacin DPI in pre-specified subgroups: a) Ciprofloxacin DPI 14-days on/off; b) Ciprofloxacin DPI 28-days on/off vs pooled (time to first exacerbation) or matching placebo (frequency of exacerbation).

a)

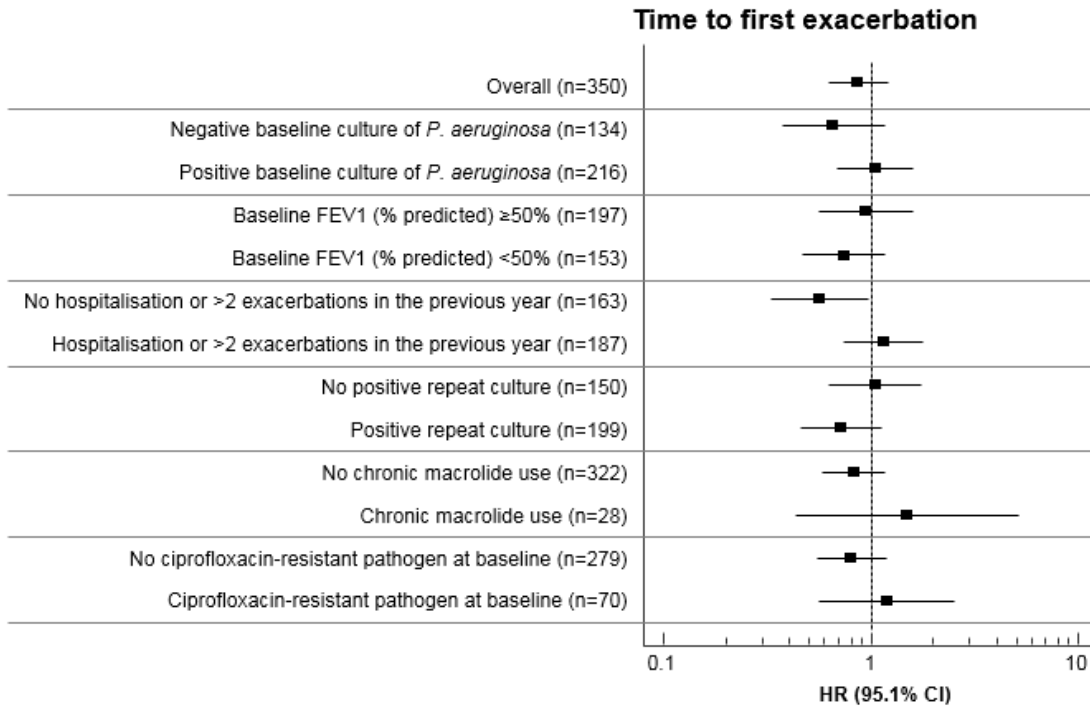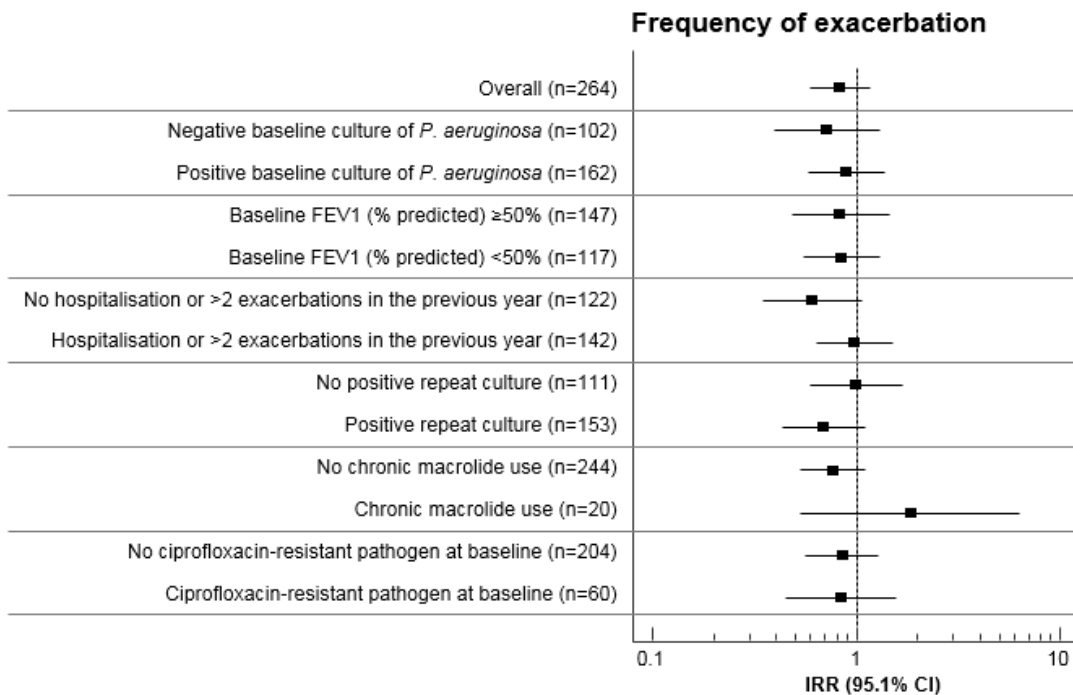

b)

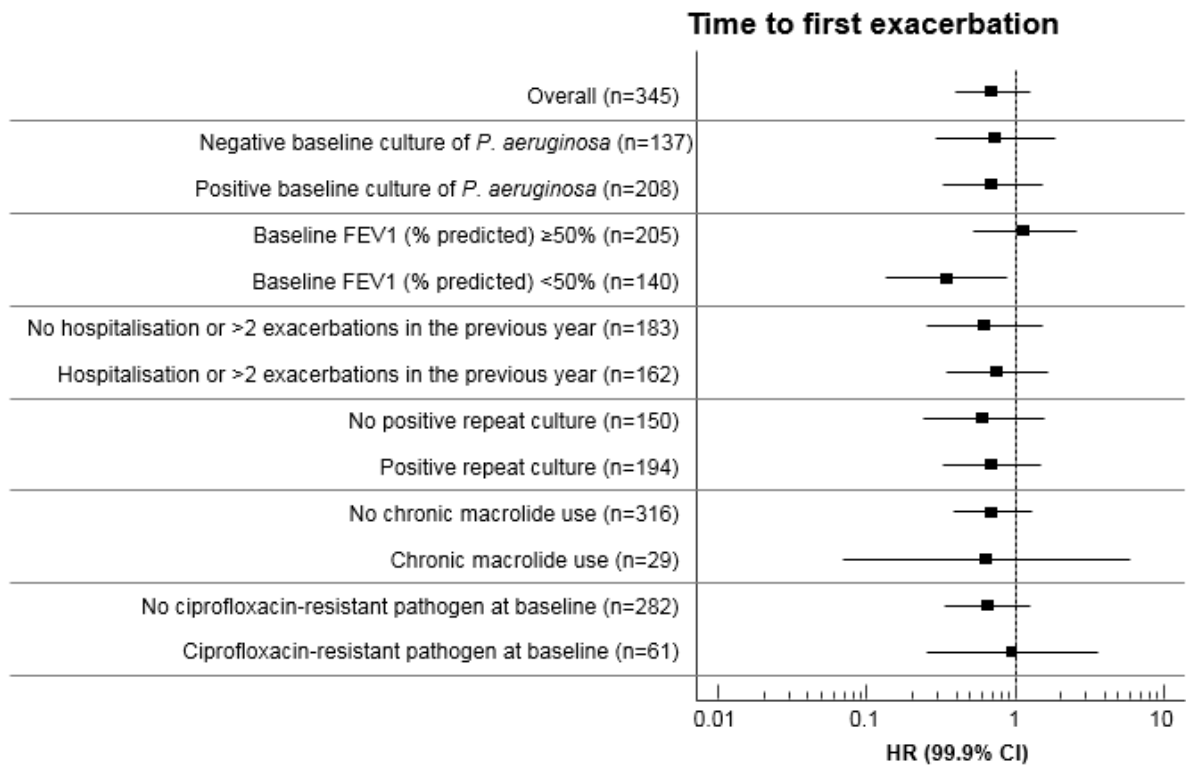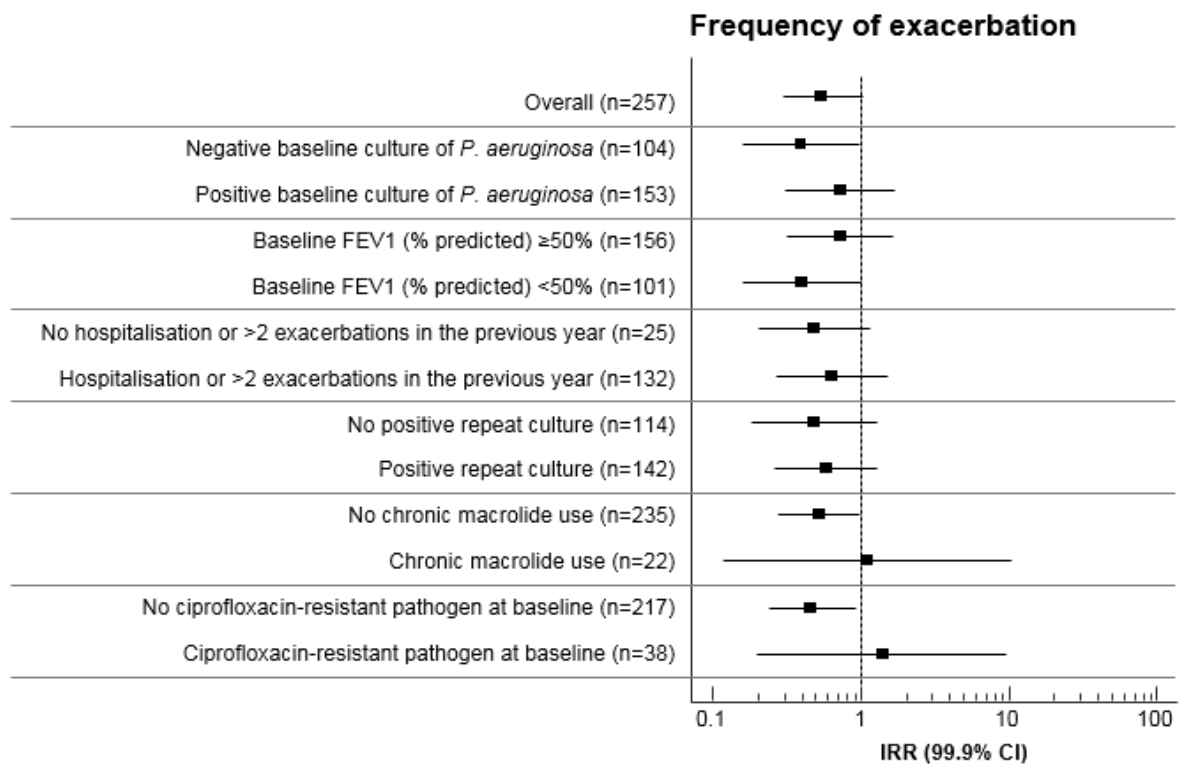

CI: confidence interval; FEV1: forced expiratory volume in 1 second; HR: hazard ratio; IRR: incidence rate ratio.
